# Supplementary material for: Post-synthetic modified luminescent metal–organic framework for the detection of berberine hydrochloride in a traditional Chinese herb
Source: Royal Society of Chemistry journal article supplement (doi:10.1039/d3ra07054a), 2024-01-01
Supplement: d3ra07054a1.pdf [file d3ra07054a1.pdf]

## Supplementary Material

### Post-synthetic modified luminescent metal-organic framework for the detection of berberine hydrochloride in traditional Chinese herb

Wei Liu,<sup>a</sup> Shuang Wu,<sup>b</sup> Tian-Xia Sun,<sup>b</sup> Jing Bai,<sup>c</sup> Ying Yang,<sup>c</sup> Wen-Hui Lian<sup>\*b</sup> and

Yu Zhao<sup>\*b</sup>

<sup>a</sup> *College of Pharmacy, Changchun University of Chinese Medicine, Changchun 130017, P.*

*R.China*

<sup>b</sup> *Jilin Ginseng Academy, Changchun University of Chinese Medicine, Changchun 130017, P.*

*R.China*

<sup>c</sup> *Jilin Ji Test Technology Co. LTD, Changchun 130017, P. R.China*

Corresponding author: Wen-Hui Lian; Yu Zhao

Email address: [lianwenhui1014@126.com](mailto:lianwenhui1014@126.com); [cnzhaoyu1972@126.com](mailto:cnzhaoyu1972@126.com)

## CONTENTS

**Figs. S1-S4**.....**SI-2**

**Table S1**.....**SI-4**

**References**.....**SI-4**

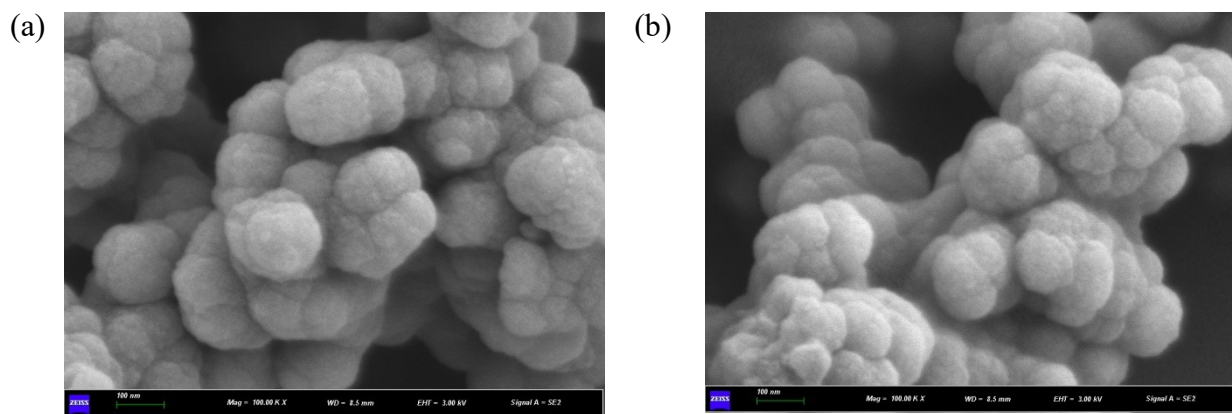

**Fig. S1** SEM images of (a) UiO-66-NH<sub>2</sub> and (b) UiO-66-PSM.

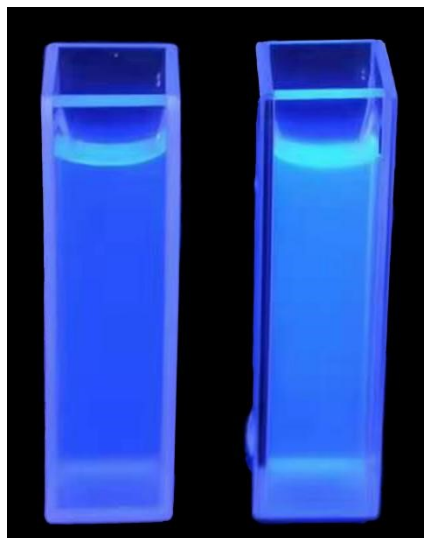

**Fig. S2** Photo image of UiO-66-NH<sub>2</sub> and UiO-66-PSM under 365 nm UV light.

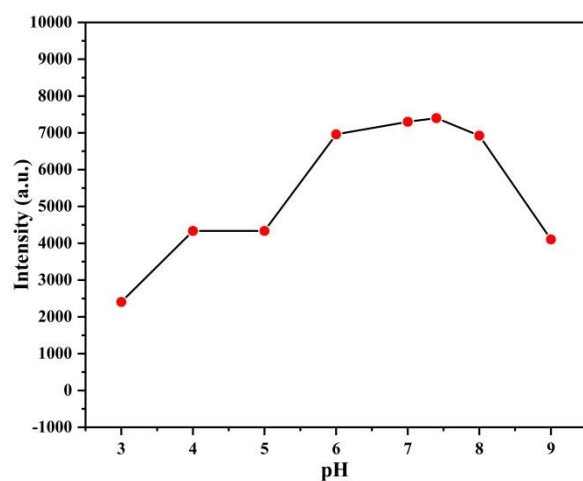

**Fig. S3** Fluorescence intensity of UiO-66-PSM at different pH values.

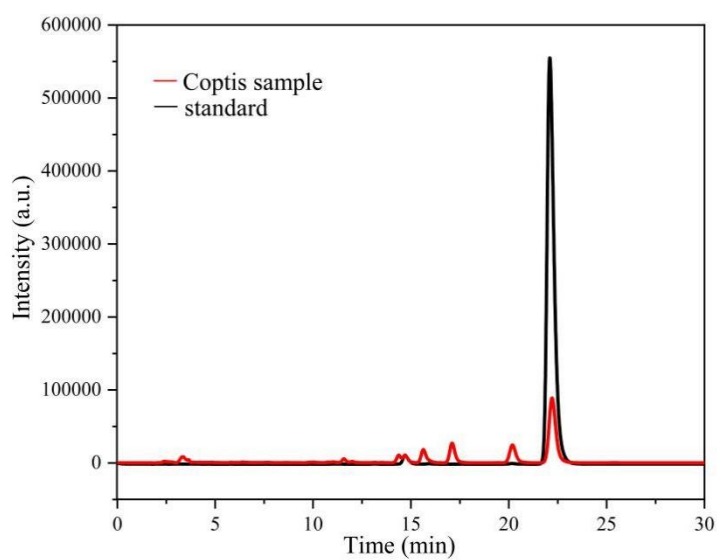

**Fig. S4** HPLC-UV chromatograms of BBH standard solution and *Coptis* sample.

**Table S1** Comparison of the present method with other reported methods for BBH determination

| Methods          | Linear range                                                  | LOD                       | Response time | Ref.      |
|------------------|---------------------------------------------------------------|---------------------------|---------------|-----------|
| HPLC             | 10–2360 ng/mL                                                 | 0.6 ng/mL                 | 2.5 min       | 1         |
| Colorimetry      | 0.05–0.4 $\mu\text{mol/L}$                                    | 13 n $\mu\text{mol/L}$    | 5 min         | 2         |
| Electrochemistry | 0.25–30 $\mu\text{mol/L}$                                     | 140 n $\mu\text{mol/L}$   | 30s           | 3         |
| Fluorescence     | 1–100 $\mu\text{mol/L}$                                       | 75 n $\mu\text{mol/L}$    | 2 min         | 4         |
| Fluorescence     | 0.5–30 $\mu\text{mol/L}$                                      | 50 n $\mu\text{mol/L}$    | 10 min        | 5         |
| Fluorescence     | 0–200 $\mu\text{mol/L}$                                       | 57.35 n $\mu\text{mol/L}$ | —             | 6         |
| Fluorescence     | 0.5–320 $\mu\text{mol/L}$                                     | 78 n $\mu\text{mol/L}$    | 15 min        | 7         |
| Fluorescence     | $1 \times 10^3$ – $1 \times 10^6$ $\mu\text{mol/L}$           | 0.3 n $\mu\text{mol/L}$   | —             | 8         |
| Fluorescence     | 10–130 $\mu\text{mol/L}$                                      | 3.5 n $\mu\text{mol/L}$   | 10 min        | 9         |
| Fluorescence     | $3.3 \times 10^{-6}$ – $6.6 \times 10^{-4}$ $\mu\text{mol/L}$ | 96 n $\mu\text{mol/L}$    | 30 s          | This work |

## References

1. J. Feng, W. Xu, X. Tao, H. Wei, F. Cal, B. Jiang and W. Chen, *J. Pharm. Biomed. Anal.*, 2010, **53**, 591-598.
2. J. Ling, Y. Sang and C. Z. Huang, *J. Pharm. Biomed. Anal.*, 2008, **47**, 860-864.
3. A. Geto, M. Pita, A. L. De Lacey, M. Tessema and S. Admassie, *Sens. Actuators B-chem*, 2013, **183**, 96-101.
4. A. Wen, X. Peng, P. Zhang, Y. Long, H. Gong, Q. Xie, M. Yue and S. Chen, *Anal. Bioanal. Chem.*, 2018, **410**, 6489-6495.
5. J.-M. Liang, F. Zhang, Y.-L. Zhu, X.-Y. Deng, X.-P. Chen, Q.-J. Zhou and K.-J. Tan, *Spectroc Acta Pt A-Molec. Biomolec. Spectr.*, 2022, **275**, 121139.
6. M. Liu, X. Du, K. Xu, B. Yan, Z. Fan, Z. Gao and X. Ren, *J. Anal. Sci. Technol.*, 2021, **12**, 11-20.
7. J. Xiong, L. Yang, L. X. Gao, P. P. Zhu, Q. Chen and K. J. Tan, *Anal. Bioanal. Chem.*, 2019, **411**, 5963-5973.
8. S. Liang, Y. Kuang, F. Ma, S. Chen and Y. Long, *Biosens. Bioelectron.*, 2016, **85**, 758-763.
9. F. Yan, Z. Sun, S. Luo and H. Zhang, *Dyes Pigment.*, 2021, **192**, 109446-109454.
